# Supplementary material
Source: PubMed Central journal article supplement (PMC4729306)
Supplement: NIHMS752613-supplement-01.pdf [file NIHMS752613-supplement-01.pdf]

(representative H&E staining; magnification x100 and x400); qRT-PCR-assisted hepatic expression of: (C) TIM-3; (D) TLR-4, TNF- $\alpha$ , IL-1 $\beta$ , and IL-6 (\*p<0.05, \*\*p<0.01, n=4-6/group).

### Supporting Information

Additional Supporting Information may be found in the online version of this article.

**Supplementary Figure 1.** Infiltration of IR-stressed OLTs by: (A) Ly6G<sup>+</sup> neutrophils; (B) CD68<sup>+</sup> macrophages (at 6h post-transplant after 20h of cold preservation) (\*p<0.05, n=4-6/group); (C) sALT levels at 6h of reperfusion in RAG<sup>-/-</sup> recipients pre-treated with anti-TIM-3 mAb or control Ig, and challenged with IR-stressed OLTs, (NS p>0.05, n=4-6/group).

Flow cytometry-assisted expression of: (D) PD-1 on TIM-3+CD4<sup>+</sup> T cells infiltrating WT OLTs (49.5 $\pm$ 1.4); (E) TIM-3 on CD4<sup>+</sup> T cells infiltrating TIM-3 Tg OLTs (269.2 $\pm$ 20.4); and (F) PD-1 on TIM-3+CD4<sup>+</sup> T cells infiltrating TIM-3 Tg OLTs (56.9 $\pm$ 2.4) at 1h of reperfusion (filled histograms represent the isotype control; representative of n=4/group).

Flow cytometry-assisted expression of: (G) TIM-3 (2.4 $\pm$ 0.2); and (H) CD69 (3.83 $\pm$ 0.13) on CD3+CD4<sup>+</sup> T cells from sham-controls (filled histograms represent isotype control [3.5 $\pm$ 0.2]; representative of n=4/group).
