# Supplementary material
Source: PubMed Central journal article supplement (PMC4729306)

# Supplementary Figure. 1

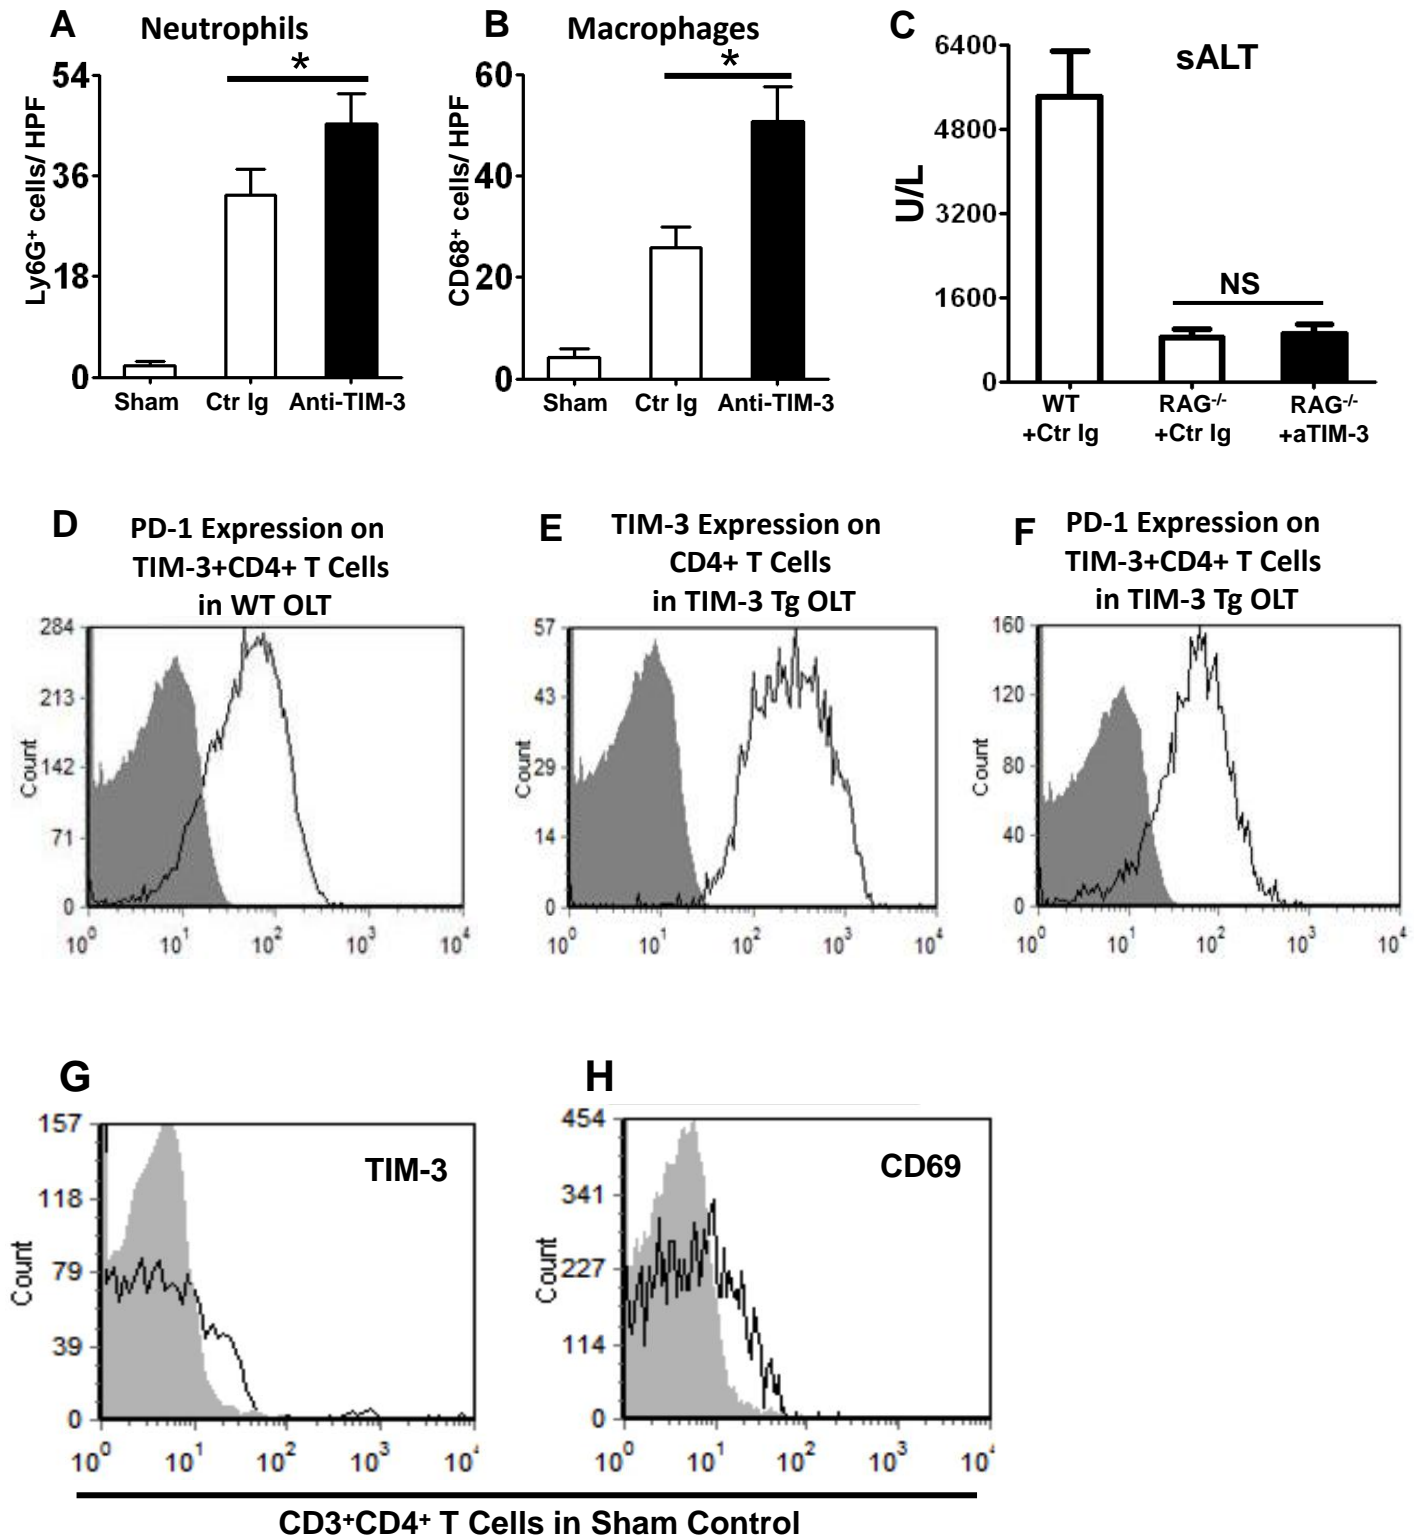

Supplement: NIHMS752613-supplement-Supp_Fig_S1.pdf [file NIHMS752613-supplement-Supp_Fig_S1.pdf]
